# Supplementary material for: Multifunctionality of Polypyrrole Polyethyleneoxide Composites: Concurrent Sensing, Actuation and Energy Storage
Source: PubMed Central journal article supplement (PMC7576489; doi:10.3390/polym12092060), 2020-09-10

Supplementary:

## Multifunctionality of Polypyrrole Polyethyleneoxide Composites: Concurrent Sensing, Actuation and Energy Storage

Nguyen Quang Khuyen <sup>1</sup>, Rudolf Kiefer <sup>1,\*</sup>, Zane Zondaka <sup>2</sup>, Gholamreza Anbarjafari <sup>3,4</sup>, Anna-Liisa Peikolainen <sup>2</sup>, Toribio F. Otero <sup>5</sup> and Tarmo Tamm <sup>2</sup>

Received: 22 August 2020; Accepted: 8 September 2020; Published: date

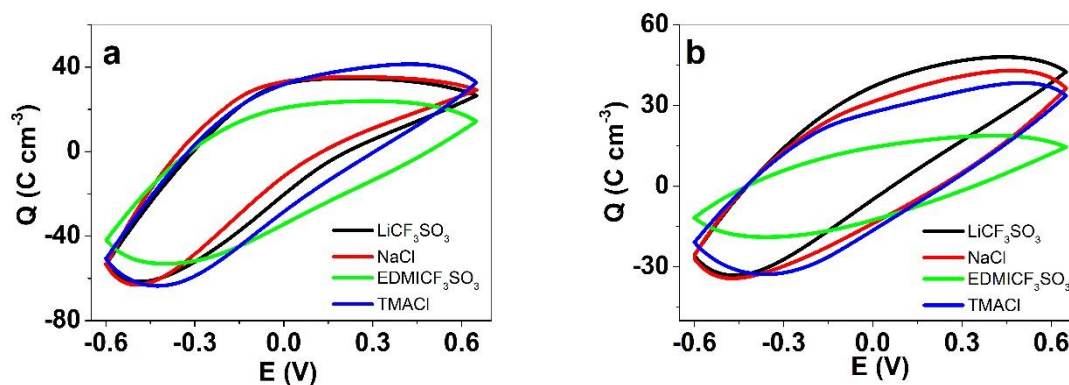

**Figure S1.** Cyclic voltammetry (scan rate  $5 \text{ mV s}^{-1}$ ) in potential range 0.65 to  $-0.6 \text{ V}$  against  $\text{Ag}/\text{AgCl}$  ( $3 \text{ M KCl}$ ) of PPy films operating in aqueous electrolytes of  $\text{LiCF}_3\text{SO}_3$  (black line),  $\text{NaCl}$  (red line),  $\text{EDMICF}_3\text{SO}_3$  (green line) and  $\text{TMACl}$  (blue line) showing the charge density  $Q$  against potential  $E$  of a: PPy-PEO/DBS and b: PPy/DBS films.

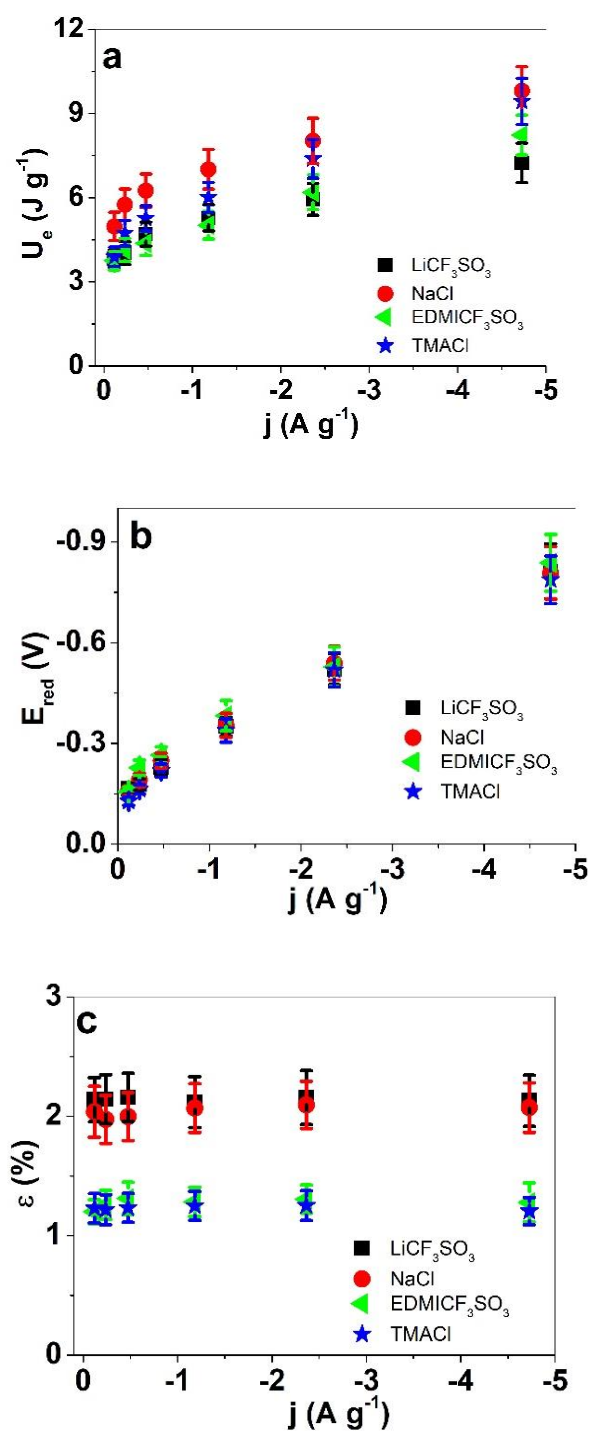

**Figure S2.** Chronoamperometry of PPy /DBS linear films at varied current densities ( $\pm 0.12 \text{ A g}^{-1}$ ,  $\pm 0.24 \text{ A g}^{-1}$ ,  $\pm 0.48 \text{ A g}^{-1}$ ,  $\pm 1.2 \text{ A g}^{-1}$ ,  $\pm 2.4 \text{ A g}^{-1}$  and  $\pm 4.8 \text{ A g}^{-1}$ ) and frequencies (0.0025 Hz, 0.005 Hz, 0.01 Hz, 0.025 Hz, 0.05 Hz and 0.1 Hz) in different aqueous electrolytes  $\text{LiCF}_3\text{SO}_3$  (■),  $\text{NaCl}$  (●),  $\text{EDMICF}_3\text{SO}_3$  (◀) and  $\text{TMACI}$  (★) showing in **a**: the electrical Energy  $U_e$ , in **b**: the potential  $E_{\text{red}}$  at reduction and in **c**: the linear strain  $\varepsilon$  against the current density  $j$  at reduction.

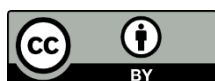

Supplement: polymers-12-02060-s001.pdf [file polymers-12-02060-s001.pdf]
