# Supplementary material for: Multifunctionality of Polypyrrole Polyethyleneoxide Composites: Concurrent Sensing, Actuation and Energy Storage
Source: MDPI journal article supplement (doi:10.3390/polym12092060), 2020-09-10
Supplement: s1 [file s1]

Supplementary:

Multifunctionality of Polypyrrole Polyethyleneoxide Composites: Concurrent Sensing, Actuation and Energy Storage

Nguyen Quang Khuyen 1, Rudolf Kiefer 1,*, Zane Zondaka 2, Gholamreza Anbarjafari 3,4, Anna-Liisa Peikolainen 2, Toribio F. Otero 5 and Tarmo Tamm 2

Received: 22 August 2020; Accepted: 8 September 2020; Published: date


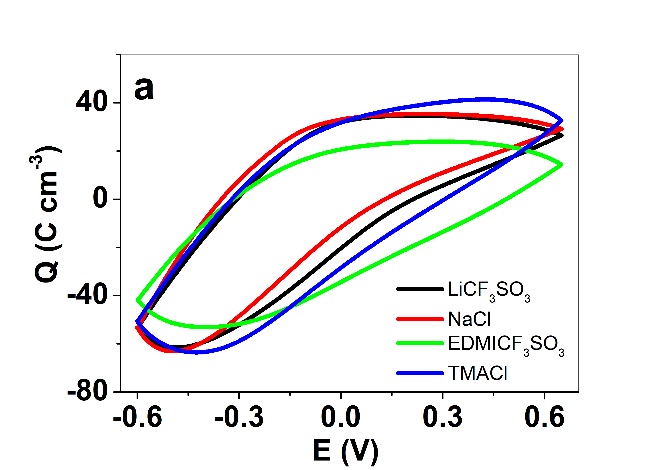

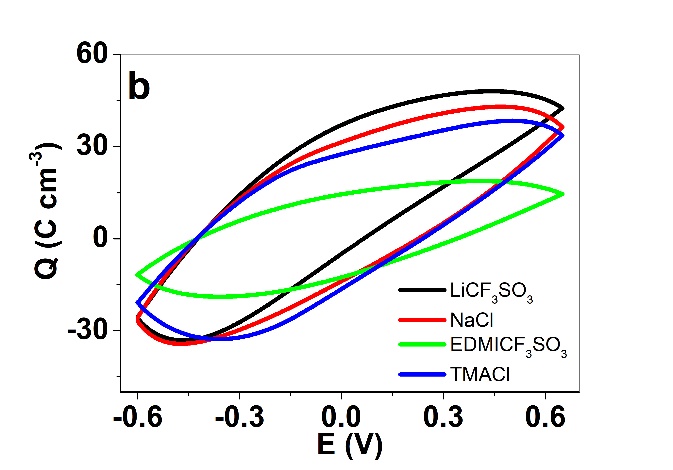


**Figure S1.** Cyclic voltammetry (scan rate 5 mV s−1) in potential range 0.65 to −0.6 V against Ag/AgCl (3 M KCl) of PPy films operating in aqueous electrolytes of LiCF3SO3 (black line), NaCl (red line), EDMICF3SO3 (green line) and TMACl (blue line) showing the charge density Q against potential E of **a**: PPy-PEO/DBS and **b**: PPy/DBS films.


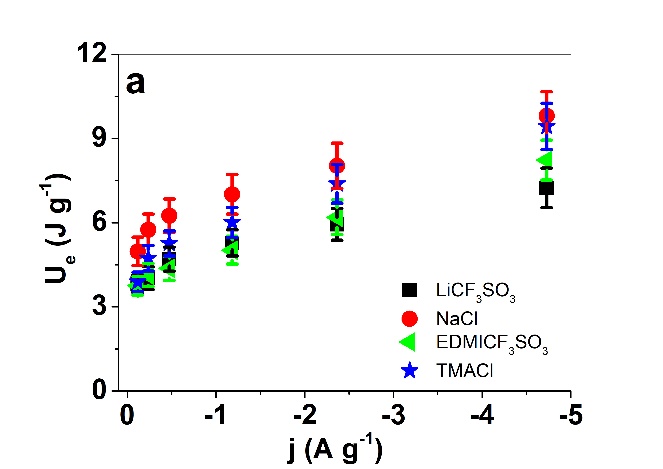

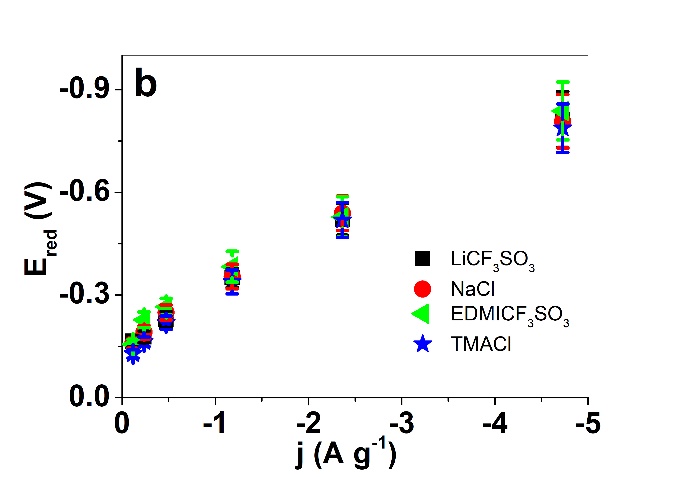

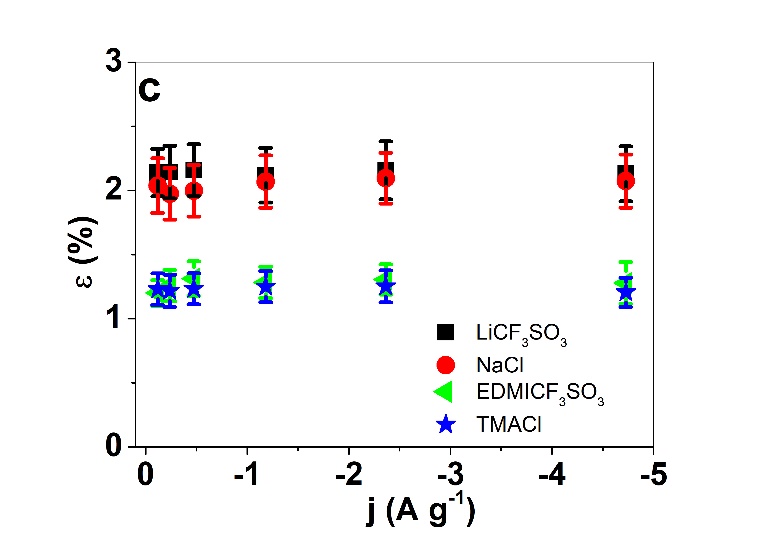


**Figure S2.** Chronoamperometry of PPy /DBS linear films at varied current densities (±0.12 A g−1, ±0.24 A g−1, ±0.48 A g−1, ±1.2 A g−1, ±2.4 A g−1 and ±4.8 A g−1) and frequencies (0.0025 Hz, 0.005 Hz, 0.01 Hz, 0.025 Hz, 0.05 Hz and 0.1 Hz) in different aqueous electrolytes LiCF3SO3 (■), NaCl (●), EDMICF3SO3 (◄) and TMACl (★) showing in **a**: the electrical Energy Ue, in **b**: the potential Ered at reduction and in **c**: the linear strain ε against the current density j at reduction.

| 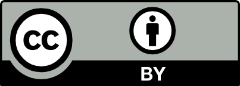 | © 2020 by the authors. Submitted for possible open access publication under the terms and conditions of the Creative Commons Attribution (CC BY) license (http://creativecommons.org/licenses/by/4.0/). |
| --- | --- |
